# Supplementary material
Source: HighWire-hosted journal article supplement (https://jnm.snmjournals.org/highwire/filestream/93896/field_highwire_adjunct_files/1/39776supplementalFig1.pdf)

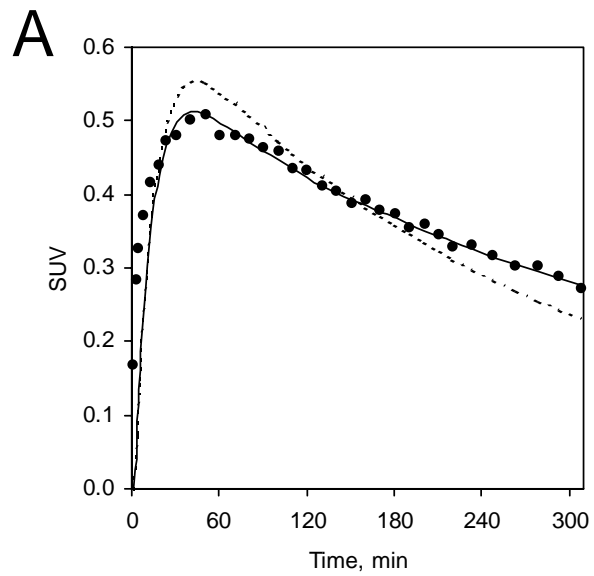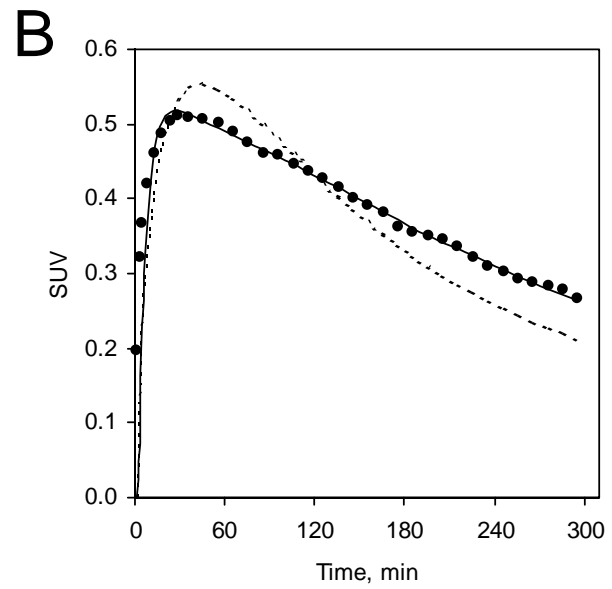

Supplement: 39776supplementalFig1.pdf [file 39776supplementalFig1.pdf]
